# Supplementary material
Source: Springer Nature journal article supplement (https://www.springermedizin.de/resource/supplementary/12936_2014_3243_MOESM6_ESM.pdf/9545450)

$AUC_{M4}/AUC_{M1}$ 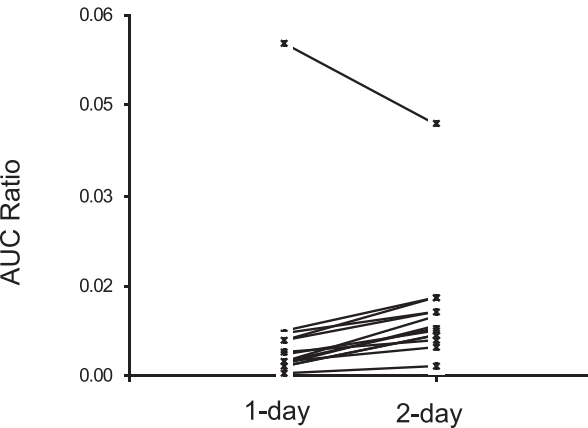 $AUC_{M5}/AUC_{M2}$ 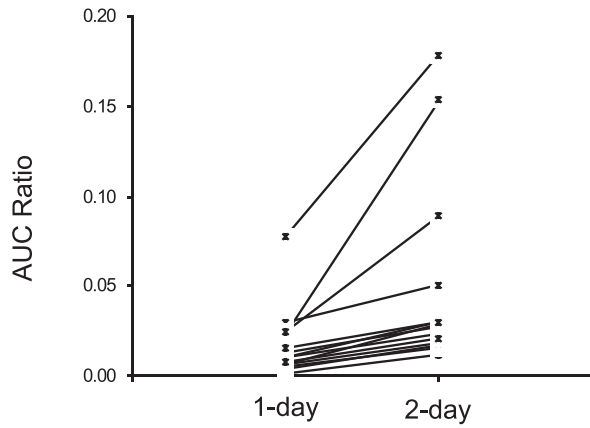

Supplement: MOESM6 [file 9545450]
